# Supplementary material for: Mesoporogen-free synthesis of nanosized hierarchical ITQ-21 zeolites
Source: Royal Society of Chemistry journal article supplement (doi:10.1039/c9qi00115h), 2019-01-01
Supplement: c9qi00115h1.pdf [file c9qi00115h1.pdf]

## Supplementary Information

### Mesoporogen-Free Synthesis of Nano-Sized Hierarchical ITQ-21 zeolites

Yilin Wang,<sup>a</sup> Qiang Zhang,<sup>a</sup> Xianyu Meng,<sup>a</sup> Risheng Bai,<sup>a</sup> Yue Yu,<sup>a</sup> Yuchuan Liu,<sup>a</sup> Xiaowei Song<sup>\*a</sup> and Jihong Yu<sup>\*a,b</sup>

<sup>a</sup>. State Key Laboratory of Inorganic Synthesis and Preparative Chemistry, College of Chemistry, Jilin University, Changchun 130012, People's Republic of China

<sup>b</sup>. International Center of Future Science, Jilin University, 2699 Qianjin Street, Changchun 130012, People's Republic of China

### Corresponding Author

E-mail: xiaowei song@jlu.edu.cn, jihong@jlu.edu.cn.

## Table of Contents

1. Experimental Section.
2. Characterizations.
3. Supplementary Figures and Tables

## Experimental section

### Materials

All reagents were used as purchased commercially without any further purification. The source materials used in the synthesis of ITQ-21 were germanium dioxide (>99.99%, Yunnan Lincang Xinyuan Germanium Industrial Co., Ltd), Ludox (SiO<sub>2</sub>, 40%, Sigma-Aldrich), HF (40%, Beijing Chemical Works), Al (OH)<sub>3</sub> (99%, Beijing Chemical Works), N, N-dicyclohexylmethylamine (98%, J&K Scientific Ltd) and methyl iodide (98%, Aladdin Industrial Co., Ltd). Heptanal (97%), 2-phenylpropanal (95%), diphenylacetaldehyde (97%) and trimethylorthoformate (98%) were purchased from Energy Chemical Co.

### Catalytic tests

The reaction conditions of carbonyl compound (heptanal, 2-phenylpropanal, or diphenylacetaldehyde) with trimethylorthoformate (TOF) were as follows: 30 mg of catalyst, 3 mmol of carbonyl compound, 15 mmol of TOF, at 120 °C for 6 h. The products were analyzed by Gas chromatography-mass spectrometry (GC-MS, Thermo Fisher Trace ISQ, equipped with TG-5MS column, 60m × 320µm × 25µm).

## Characterizations.

### Material Characterizations

Powder X-ray diffraction analysis (XRD) of the samples was carried out on a Rigaku D-Max 2550 diffractometer using Cu K $\alpha$  radiation ( $\lambda = 1.5418 \text{ \AA}$ , 50 kV). The scanning electron microscope (SEM) images were obtained with a JSM-6700F electron microscope. Transmission electron microscopy (TEM) images were JEM-2100 electron microscope. Nitrogen adsorption-desorption measurements were carried out on a Micromeritics ASAP 2020 Plus analyser at 77 K. All the samples were activated by degassing in-situ at about 573 K for 10 h. Chemical compositions were determined with Inductively Coupled Plasma Optical Emission Spectrometry (ICP-AES) analysis performed on an iCAP 7000 SERIES. The temperature-programmed desorption of ammonia (NH<sub>3</sub>-TPD) experiments were carried out with a Micromeritics AutoChem II 2920 automated chemisorption analysis unit with a thermal conductivity detector (TCD) under helium flow. <sup>27</sup>Al magic-angle spinning (MAS) NMR spectrum was recorded on a Varian Infinity plus 400 spectrometer at resonance frequencies of 104.2 MHz with spinning rates of 6 KHz. <sup>1</sup>H NMR spectrum was recorded on a Varian Mercury spectrometer operating at frequencies of 300 MHz.

## Captions

**Fig. S1.**  $^{13}\text{C}$  NMR spectrum of the organic structure-directing agent OSDABr.

**Fig. S2** TEM images of nanosized hierarchical germanosilicate ITQ-21 samples crystallized at different crystallization time (a) I-1, (b) I-1.5, (c) I-2, (d) I-12, (e)I-48, and (f) I-72.

**Fig. S3** TEM images of calcined Al-containing samples of (a) Al-ITQ-21/150, (b) Al-ITQ-21/100, and (c) Al-ITQ-21/15 (The T/Al ratios in the starting gels are 150, 100, and 15).

**Fig. S4**  $^{27}\text{Al}$  MAS NMR spectrum of the calcined Al-ITQ-21/15 sample.

**Fig. S5**  $\text{NH}_3$ -TPD analyses of germanosilicate sample with crystallization time of 72 h and different Al-containing samples (T/Al of 15, and 100, T=Si+Ge)

**Table S1** Elemental analyses and product yields of the calcined ITQ-21 zeolites with different crystallization time.

**Table S2** Textural properties of the ITQ-21 zeolites with crystallization time of 1 h, 2 h, 12 h, 48 h, and 72 h and Al-containing samples of Al-ITQ-21/15 and Al-ITQ-21/100.

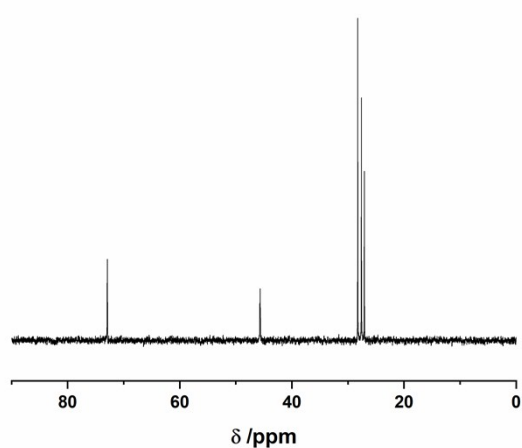

**Fig. S1.**  $^{13}\text{C}$  NMR spectrum of the organic structure-directing agent OSDABr.

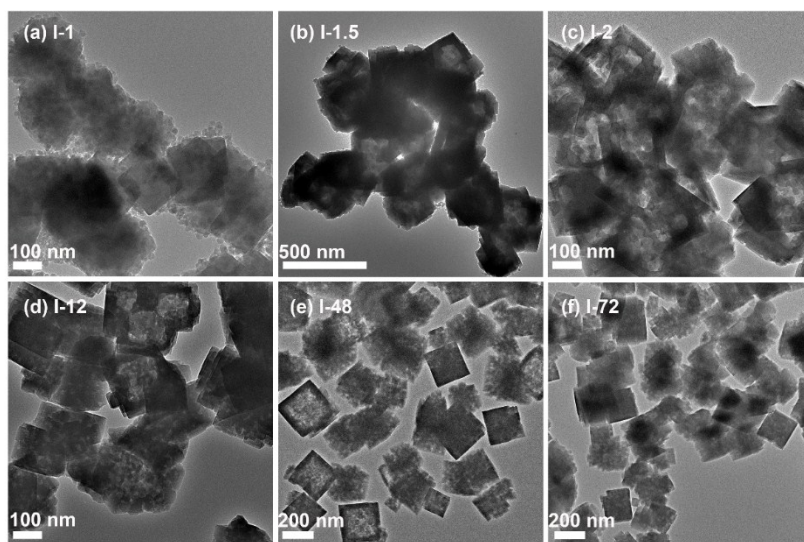

**Fig. S2** TEM images of nanosized hierarchical germanosilicate ITQ-21 samples crystallized at different crystallization time (a) I-1, (b) I-1.5, (c) I-2, (d) I-12, (e) I-48, and (f) I-72.

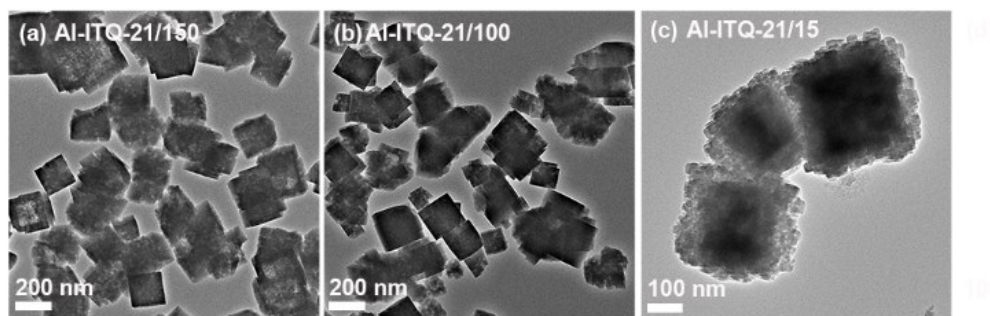

**Fig. S3** TEM images of calcined Al-containing samples of (a) Al-ITQ-21/150, (b) Al-ITQ-21/100, and (c) Al-ITQ-21/15. (The T/Al ratios in the starting gels are 150, 100, and 15).

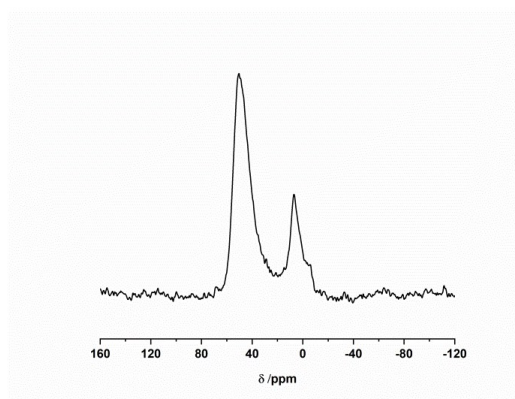

**Fig. S4.**  $^{27}\text{Al}$  MAS NMR spectrum of the calcined Al-ITQ-21/15 sample.

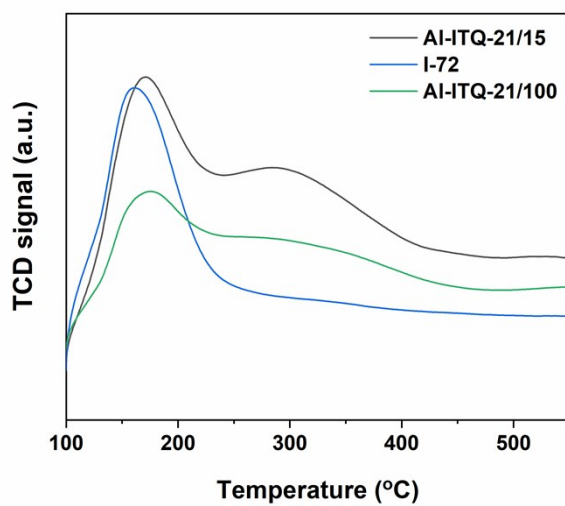

**Fig. S5.**  $\text{NH}_3$ -TPD analyses of germanosilicate sample with crystallization time of 72 h and different molar ratio Al-containing samples, T/Al of 15 and 100. (T=Si+Ge)

**Table S1** Elemental analyses and product yields of the calcined ITQ-21 zeolites with different crystalline time.

| Samples       | Si/Ge <sup>a</sup> | T/Al <sup>b</sup> | Yield <sup>c</sup><br>(%) |
|---------------|--------------------|-------------------|---------------------------|
| I-1           | 1.78               | /                 | 73.8                      |
| I-1.5         | 1.75               | /                 | 78.6                      |
| I-2           | 1.68               | /                 | 82.3                      |
| I-9           | 1.67               | /                 | 94.7                      |
| I-12          | 1.69               | /                 | 93.1                      |
| I-18          | 1.71               | /                 | 93.5                      |
| I-24          | 1.69               | /                 | 92.7                      |
| I-48          | 1.93               | /                 | 93.2                      |
| I-72          | 1.91               | /                 | 93.0                      |
| Al-ITQ-21/100 | /                  | 84                | /                         |
| Al-ITQ-21/15  | /                  | 17                | /                         |

<sup>a,b</sup> Measured by inductively coupled plasma (ICP-AES). <sup>c</sup> Yield =  $w_1/w_2 \times 100\%$ , where  $w_1$  and  $w_2$  are the weight of the calcined sample and theoretical ITQ-21 sample, respectively.

**Table S2** Textural properties of the ITQ-21 zeolites with crystallization time of 1 h, 2 h, 9 h, 12 h, 48 h, and 72 h and Al-containing samples of Al-ITQ-21/15 and Al-ITQ-21/100.

| Samples       | $S_{\text{BET}}$ (m <sup>2</sup> /g) <sup>a</sup> | $S_{\text{micro}}$ (m <sup>2</sup> /g) <sup>b</sup> | $S_{\text{ext}}$ (m <sup>2</sup> /g) <sup>b</sup> | $V_{\text{micro}}$ (cm <sup>3</sup> /g) <sup>b</sup> | $V_{\text{meso}}$ (cm <sup>3</sup> /g) <sup>c</sup> |
|---------------|---------------------------------------------------|-----------------------------------------------------|---------------------------------------------------|------------------------------------------------------|-----------------------------------------------------|
| I-1           | 168                                               | 127                                                 | 40                                                | 0.06                                                 | 0.08                                                |
| I-2           | 341                                               | 257                                                 | 83                                                | 0.12                                                 | 0.15                                                |
| I-12          | 360                                               | 296                                                 | 64                                                | 0.12                                                 | 0.06                                                |
| I-48          | 416                                               | 348                                                 | 67                                                | 0.16                                                 | 0.10                                                |
| I-72          | 462                                               | 362                                                 | 101                                               | 0.17                                                 | 0.19                                                |
| Al-ITQ-21/100 | 516                                               | 416                                                 | 98                                                | 0.19                                                 | 0.11                                                |
| Al-ITQ-21/15  | 575                                               | 356                                                 | 219                                               | 0.17                                                 | 0.30                                                |

<sup>a</sup>  $S_{\text{BET}}$  (total surface area) is calculated by applying the BET equation using the linear part ( $0.05 < P/P_0 < 0.30$ ) of the adsorption isotherm; <sup>b</sup>  $S_{\text{micro}}$  (micropore area),  $S_{\text{ext}}$  (external area), and  $V_{\text{micro}}$  (micropore volume) are calculated using the t-plot method; <sup>c</sup>  $V_{\text{meso}}$  (mesoporous volume) is calculated using the BJH method (from desorption).
